# Supplementary material for: Using a Fragment-Based Approach To Target Protein–Protein Interactions
Source: PubMed Central journal article supplement (PMC3594973; doi:10.1002/cbic.201200521), 2013-01-23
Supplement: cbic0014-0332-SD1.pdf [file cbic0014-0332-SD1.pdf]

# CHEMBIOCHEM

## Supporting Information

© Copyright Wiley-VCH Verlag GmbH & Co. KGaA, 69451 Weinheim, 2013

### **Using a Fragment-Based Approach To Target Protein– Protein Interactions**

Duncan E. Scott,<sup>[a]</sup> Matthias T. Ehebauer,<sup>[b, d]</sup> Tara Pukala,<sup>[a, e]</sup> May Marsh,<sup>[b]</sup> Tom L. Blundell,<sup>[b]</sup>  
Ashok R. Venkitaraman,<sup>[c]</sup> Chris Abell,<sup>[a]</sup> and Marko Hyvönen<sup>\*[b]</sup>

cbic\_201200521\_sm\_miscellaneous\_information.pdf

## Supplementary content

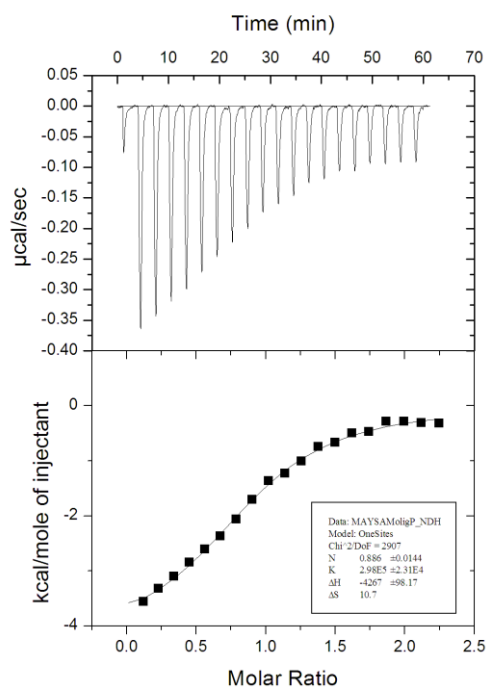

**Figure S1** ITC of RadA oligomerization peptide Ac-NLGTFMRADEYLKKR-NH<sub>2</sub> against MAYSAM RadA,  $K_D = 3.3 \mu\text{M}$

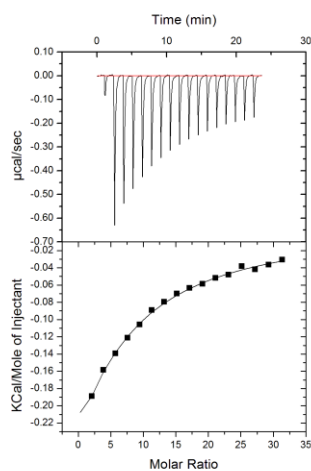

**Figure S2** Titration of fragment 2 against MAYSAM RadA ( $K_D = 2.1 \text{ mM}$ ).

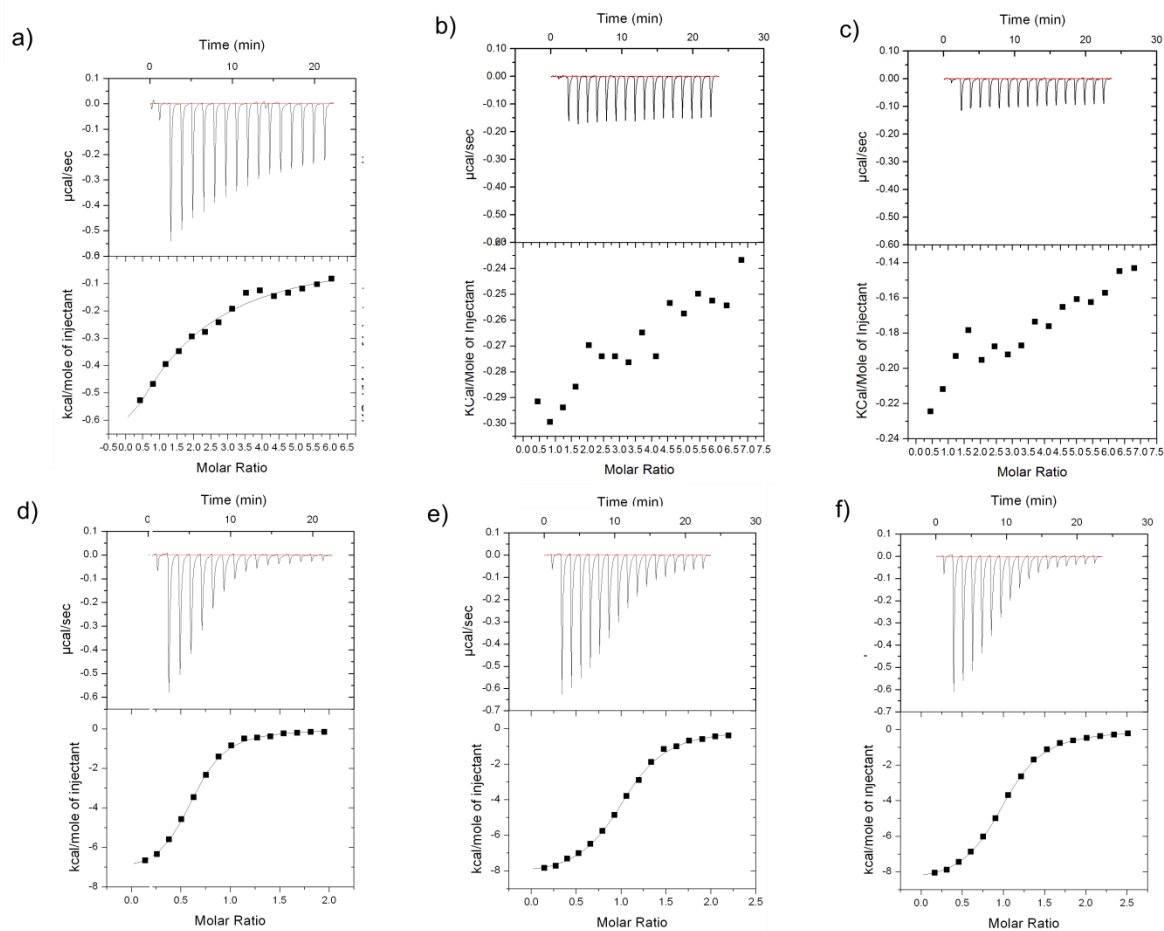

**Figure S3** (a)-(c) Titrations of FHTA against (a) apo MAYSAM RadA ( $K_D = 250 \pm 50 \mu\text{M}$ ) (b) in the presence of fragment 1 (5 mM) and (c) in the presence of fragment 2 (5 mM). (d)-(f) Titrations of ATP against d) apo MAYSAM RadA (e) in the presence of fragment 1 (5 mM) and (f) in the presence of fragment 2 (5 mM).

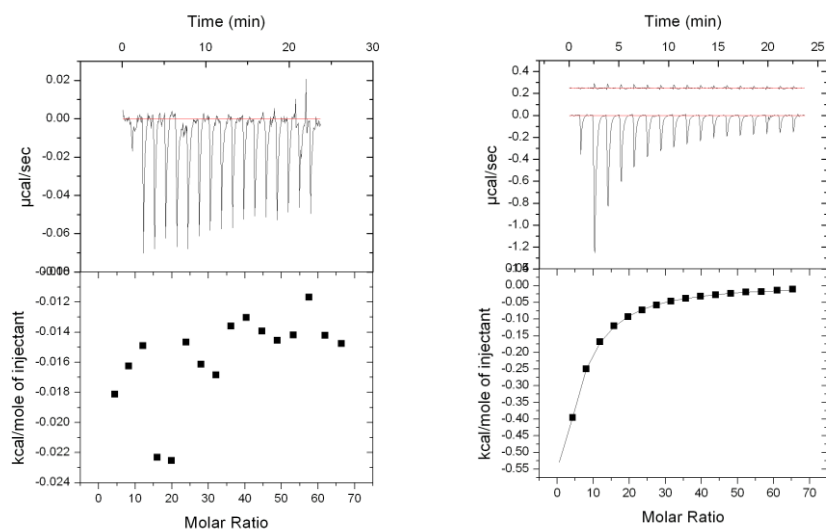

**Figure S4** *Left:* Titration of 2-amino-6-chlorobenzoxazole **7** against MAYSAM RadA. *Right:* Titration of 2-aminobenzothiazole **6** against MAYSAM RadA,  $K_D = 0.73$  mM

## Supplementary Table S1, Scott et al.

## Crystallographic data collection and refinement statistics (page 1)

| Ligand                             | 1 (5-hydroxy indole)                     | 2 (5-methyl indole)                      | 4 (4-methylester indole)                  | 5 (indazole)                              | 6 (4-amino benzothiazole)                  |
|------------------------------------|------------------------------------------|------------------------------------------|-------------------------------------------|-------------------------------------------|--------------------------------------------|
| PDB code:                          | 4b3c                                     | 4d3d                                     | 4b35                                      | 4b2i                                      | 4b34                                       |
| <b>Data collection:</b>            |                                          |                                          |                                           |                                           |                                            |
| Beamline:                          | In-house source                          | ESRF ID14-4                              | ESRF ID14-4                               | ESRF ID14-4                               | Diamond I04                                |
| X-ray wavelength:                  | 1.5418 Å                                 | 0.9765 Å                                 | 0.9795 Å                                  | 0.9795 Å                                  | 0.9728 Å                                   |
| <b>Data processing (XDS):</b>      |                                          |                                          |                                           |                                           |                                            |
| Resolution limit:                  | 1.89 Å                                   | 1.59 Å                                   | 1.40 Å                                    | 1.30 Å                                    | 1.55 Å                                     |
| High resolution shell:             | 2.00 - 1.89 Å                            | 1.69 - 1.59 Å                            | 1.48 - 1.40 Å                             | 1.38 - 1.30 Å                             | 1.64 - 1.55 Å                              |
| Completeness<br>(high res. shell): | 98.8% (93.0%)                            | 99.2% (96.5%)                            | 89.3% (91.7%)                             | 98.8% (99.1%)                             | 99.3% (98.8%)                              |
| No of unique reflections:          | 17821 (2653)                             | 57763 (9076)                             | 35882 (5917)                              | 49540 (8001)                              | 29702 (4763)                               |
| Rmerge:                            | 11.7 % (73.5 %)                          | 6.2 % (60.7 %)                           | 3.6 % (45.8 %)                            | 3.6 % (49.1 %)                            | 5.2 % (58.0 %)                             |
| I/sigma(I):                        | 14.65 (2.55)                             | 13.76 (2.19)                             | 16.16 (2.27)                              | 18.21 (2.56)                              | 16.49 (2.23)                               |
| Spacegroup:                        | P21212                                   | P21                                      | P21                                       | P21                                       | P21                                        |
| Unit cell:                         | 70.56 74.54 41.17<br>90.000 90.000 90.00 | 40.280 87.246 62.628<br>90.000 91.502 90 | 37.64 78.71 39.59 90.000<br>117.913 90.00 | 37.62 78.77 39.63 90.000<br>118.055 90.00 | 37.57 79.23 39.61 90.000<br>117.844 90.000 |
| <b>Refinement (phenix.refine):</b> |                                          |                                          |                                           |                                           |                                            |
| R factor                           | 0.2072                                   | 0.1786                                   | 0.1896                                    | 0.1993                                    | 0.1868                                     |
| R free                             | 0.2612                                   | 0.2120                                   | 0.2231                                    | 0.2232                                    | 0.2236                                     |
| msd bond lengths                   | 0.010 Å                                  | 0.006 Å                                  | 0.006 Å                                   | 0.006 Å                                   | 0.006 Å                                    |
| rmsd bond angles                   | 1.186°                                   | 0.982°                                   | 1.508°                                    | 1.549°                                    | 1.566°                                     |
| Ramachandran analysis              | 97.5/2.0                                 | 98.9/1.1                                 | 97/3                                      | 97/3                                      | 97/3                                       |
| % preferred / allowed regions      |                                          |                                          |                                           |                                           |                                            |

## Crystallographic data collection and refinement statistics (page 2)

|                                    |                                            |                                            |                                            |                                              |
|------------------------------------|--------------------------------------------|--------------------------------------------|--------------------------------------------|----------------------------------------------|
| Ligand                             | 8 (L-methyl ester tryptophan)              | 9 (napht-1-ol)                             | 10 (napht-2-ol)                            | FHTA peptide                                 |
| PDB code:                          | 4b2l                                       | 4b32                                       | 4b33                                       | 4b3b                                         |
| <b>Data collection:</b>            |                                            |                                            |                                            |                                              |
| Beamline:                          | Diamond I04                                | Diamond I04                                | Diamond I04                                | Diamond I04                                  |
| X-ray wavelength:                  | 0.972800 Å                                 | 0.972800 Å                                 | 0.972800 Å                                 | 0.9330 Å                                     |
| <b>Data processing:</b>            |                                            |                                            |                                            |                                              |
| Resolution limit:                  | 1.50 Å                                     | 1.50 Å                                     | 1.50 Å                                     | 1.19 Å                                       |
| High resolution shell:             | 1.59 - 1.50 Å                              | 1.59 - 1.50 Å                              | 1.59 - 1.50 Å                              | 1.26 - 1.19 Å                                |
| Completeness<br>(high res. shell): | 96.7% (94.6%)                              | 99.2% (98.8%)                              | 96.7% (95.2%)                              | 93.4% (90.4%)                                |
| No of unique reflections:          | 31779 (4968)                               | 32695 (5252)                               | 31815 (5062)                               | 64405 (9949)                                 |
| Rmerge:                            | 4.1 % (47.2 %)                             | 4.2 % (37.6 %)                             | 3.8 % (40.0 %)                             | 5.8 % (24.0 %)                               |
| I/sigma (I):                       | 19.16 (2.83)                               | 18.36 (3.42)                               | 19.18 (3.04)                               | 16.06 (5.14)                                 |
| Spacegroup:                        | P21                                        | P21                                        | P21                                        | P212121                                      |
| Unit cell:                         | 37.60 78.63 39.62<br>90.000 117.479 90.000 | 37.69 79.05 39.62 90.000<br>117.883 90.000 | 37.66 78.71 39.67 90.000<br>117.906 90.000 | 40.225 60.589 87.526<br>90.000 90.000 90.000 |
| <b>Refinement:</b>                 |                                            |                                            |                                            |                                              |
| R factor                           | 0.1862                                     | 0.1891                                     | 0.1882                                     | 0.1400                                       |
| R free                             | 0.2230                                     | 0.2276                                     | 0.2269                                     | 0.1671                                       |
| msd bond lengths                   | 0.006 Å                                    | 0.006 Å                                    | 0.006 Å                                    | 0.010 Å                                      |
| rmsd bond angles                   | 1.545°                                     | 1.577°                                     | 1.568°                                     | 1.397°                                       |
| Ramachandran analysis              | 97.6/2.3                                   | 96.7/3.2                                   | 97.2/2.8                                   | 98.4/1.6                                     |
| % preferred / allowed regions      |                                            |                                            |                                            |                                              |
